# Supplementary material for: Emotional impact on children during home confinement in Spain
Source: Research Square preprint supplement (doi:10.21203/rs.3.rs-1341840/v1), 2022-02-14
Supplement: Supplementary file 1 [file 6c693522f0fe266551f24d44.pdf]

Table S1. Complete descriptive analysis of all the variables analyzed

|                                           | DESCRIPTIVE                      | n    |      |
|-------------------------------------------|----------------------------------|------|------|
| Emotional state                           | 0-2 negative emotions            | 994  | 66.2 |
|                                           | 3-4 negative emotions            | 507  | 33.8 |
| Sex                                       | Male                             | 772  | 51.4 |
|                                           | Female                           | 729  | 48.6 |
| Autonomous Community group                | Other Autonomous Communities     | 241  | 16.1 |
|                                           | Valencian Community              | 1260 | 83.9 |
| Only child                                | No                               | 1124 | 74.9 |
|                                           | Yes                              | 377  | 25.1 |
| Location of home                          | No answer                        | 137  | 9.1  |
|                                           | Urban                            | 1167 | 77.7 |
|                                           | Rural                            | 197  | 13.1 |
| Size of home                              | No answer                        | 137  | 9.1  |
|                                           | Less than 60                     | 50   | 3.3  |
|                                           | From 60 to 120                   | 882  | 58.8 |
|                                           | More than 120                    | 432  | 28.8 |
| Outdoor space at home (garden or terrace) | No answer                        | 137  | 9.1  |
|                                           | Yes                              | 697  | 46.4 |
|                                           | No                               | 667  | 44.4 |
| Underlying disease                        | Yes                              | 161  | 10.7 |
|                                           | No                               | 1340 | 89.3 |
| Parents are Healthcare workers            | Yes                              | 338  | 22.5 |
|                                           | No                               | 1163 | 77.5 |
| Security                                  | Yes                              | 70   | 4.7  |
|                                           | No                               | 1431 | 93   |
| Other essential work                      | Yes                              | 590  | 39.3 |
|                                           | No                               | 911  | 60.7 |
| Have had COVID-19                         | No answer                        | 891  | 59.4 |
|                                           | No                               | 512  | 34.1 |
|                                           | Yes, but no one in our household | 70   | 4.7  |
|                                           | Yes, someone in our household    | 28   | 1.9  |
| Pets in the home                          | Yes                              | 610  | 40.6 |
|                                           | No                               | 891  | 59.4 |
| Disability                                | Yes                              | 37   | 2.5  |
|                                           | No                               | 1464 | 97.5 |

|                                                | <b>Dimensions: Communication, Normality after the pandemic, Disease control and Non-emotional involvement</b> | n    |      |
|------------------------------------------------|---------------------------------------------------------------------------------------------------------------|------|------|
| Information given to the children              | I have tried to be honest, including the most negative aspects                                                | 1427 | 95.1 |
|                                                | I have tried to be honest but avoiding the most negative aspects                                              | 74   | 4.9  |
|                                                | I have preferred not to give information                                                                      | 1276 | 85.0 |
| Questions about the pandemic                   | Yes                                                                                                           | 576  | 38.4 |
|                                                | No                                                                                                            | 1066 | 71.0 |
| Type of information given to the children      | Realistic information                                                                                         | 284  | 18.9 |
|                                                | Information misrepresenting the negative aspects                                                              | 74   | 4.9  |
|                                                | Creative explanations                                                                                         | 77   | 5.1  |
|                                                | No information                                                                                                | 1396 | 93.0 |
| Information adapted to the age of the children | Yes                                                                                                           | 48   | 3.2  |
|                                                | No                                                                                                            | 57   | 3.8  |
|                                                | I'm not sure                                                                                                  | 593  | 39.5 |
| Sleep disturbance                              | Yes                                                                                                           | 908  | 60.5 |
|                                                | No                                                                                                            | 356  | 23.7 |
| Changes in appetite                            | Has more                                                                                                      | 896  | 59.7 |
|                                                | No change                                                                                                     | 249  | 16.6 |
|                                                | Has less                                                                                                      | 281  | 18.7 |
| Changes in diet                                | Better                                                                                                        | 926  | 61.7 |
|                                                | No change                                                                                                     | 294  | 19.6 |
|                                                | Worse                                                                                                         | 994  | 66.2 |
| Hours of screen time (children)                | No answer                                                                                                     | 1372 | 91.4 |
|                                                | Does not use                                                                                                  | 1    | 0.1  |
|                                                | <1h                                                                                                           | 7    | 0.5  |
|                                                | 1-2h                                                                                                          | 24   | 1.6  |
|                                                | 2-3h                                                                                                          | 45   | 3.0  |
|                                                | 3-4h                                                                                                          | 26   | 1.7  |
|                                                | >4h                                                                                                           | 26   | 1.7  |
| Medical consultation                           | Yes                                                                                                           | 264  | 17.6 |
|                                                | No                                                                                                            | 1237 | 82.4 |
| Return to activity after pandemic              | Yes                                                                                                           | 509  | 33.9 |
|                                                | No                                                                                                            | 992  | 66.1 |

**Table S2. Quantitative variables in the descriptive analysis**

|                              | n    | Minimum | Maximum | Mean | SD   |
|------------------------------|------|---------|---------|------|------|
| Age                          | 1501 | 0       | 16      | 6.78 | 3.24 |
| Number of children in family | 1501 | 1       | 10      | 1.93 | 0.78 |
| Number of adults             | 1501 | 1       | 6       | 2.03 | 0.48 |

**Table S3. Complete bivariate analysis of the variables analyzed for emotional state (good: 0-2 negative emotions or poor: 3-4 negative emotions, including sadness, fear, irritability and physical symptoms)**

|                                                |                                          | 0-2 negative emotions |       | 3-4 negative emotions |       | p-value |
|------------------------------------------------|------------------------------------------|-----------------------|-------|-----------------------|-------|---------|
|                                                |                                          | n                     | %     | n                     | %     |         |
| Information adapted to the age of the children | I have tried to be honest                | 931                   | 65.2% | 496                   | 34.8% | <0.001  |
|                                                | I have preferred not to give information | 63                    | 85.1% | 11                    | 14.9% |         |
| Situation will normalize after the pandemic    | Yes                                      | 922                   | 72.3% | 354                   | 27.7% | <0.001  |
|                                                | No                                       | 72                    | 32.0% | 153                   | 68.0% |         |
| Underlying disease                             | Yes                                      | 93                    | 57.8% | 68                    | 42.2% | 0.016   |
|                                                | No                                       | 901                   | 67.2% | 439                   | 32.8% |         |
| Autonomous Community (regions)                 | Other Autonomous Communities             | 170                   | 70.5% | 71                    | 29.5% | 0.122   |
|                                                | Valencian Community                      | 824                   | 65.4% | 436                   | 34.6% |         |
| Sex                                            | Male                                     | 528                   | 68.4% | 244                   | 31.6% | 0.067   |
|                                                | Female                                   | 466                   | 63.9% | 263                   | 36.1% |         |
| Only child                                     | No                                       | 719                   | 64.0% | 405                   | 36.0% | 0.001   |
|                                                | Yes                                      | 275                   | 72.9% | 102                   | 27.1% |         |
| Parents healthcare workers                     | Yes                                      | 235                   | 69.5% | 103                   | 30.5% | 0.145   |
|                                                | No                                       | 759                   | 65.3% | 404                   | 34.7% |         |
| Security                                       |                                          | 52                    | 74.3% | 18                    | 25.7% | 0.144   |
|                                                |                                          | 942                   | 65.8% | 489                   | 34.2% |         |
| Other essential work                           | Yes                                      | 375                   | 63.6% | 215                   | 36.4% | 0.079   |
|                                                | No                                       | 619                   | 67.9% | 292                   | 32.1% |         |
| Pets in the home                               | Yes                                      | 419                   | 68.7% | 191                   | 31.3% | 0.095   |
|                                                | No                                       | 575                   | 64.5% | 316                   | 35.5% |         |
| Questions                                      | Yes                                      | 509                   | 55.0% | 416                   | 45.0% | <0.001  |

|                                             |                                                  | 0-2 negative emotions |        | 3-4 negative emotions |       | p-value |
|---------------------------------------------|--------------------------------------------------|-----------------------|--------|-----------------------|-------|---------|
|                                             |                                                  | n                     | %      | n                     | %     |         |
| about the pandemic                          | No                                               | 485                   | 84.2%  | 91                    | 15.8% |         |
| Type of information given to the child      |                                                  | 695                   | 65.2%  | 371                   | 34.8% |         |
|                                             | Realistic information                            |                       |        |                       |       | <0.001  |
|                                             | Information misrepresenting the negative aspects | 172                   | 60.6%  | 112                   | 39.4% |         |
|                                             | Creative explanations                            | 62                    | 83.8%  | 12                    | 16.2% |         |
|                                             | No information                                   | 65                    | 84.4%  | 12                    | 15.6% |         |
| Information adapted to the age of the child | Yes                                              | 922                   | 66.0%  | 474                   | 34.0% | 0.012   |
|                                             | No                                               | 40                    | 83.3%  | 8                     | 16.7% |         |
|                                             | I'm not sure                                     | 32                    | 56.1%  | 25                    | 43.9% |         |
| Sleep disturbances                          | Yes                                              | 284                   | 47.9%  | 309                   | 52.1% | <0.001  |
|                                             | No                                               | 710                   | 78.2%  | 198                   | 21.8% |         |
| Changes in appetite                         | Has more                                         | 205                   | 57.6%  | 151                   | 42.4% | <0.001  |
|                                             | No changes                                       | 675                   | 75.3%  | 221                   | 24.7% |         |
|                                             | Has less                                         | 114                   | 45.8%  | 135                   | 54.2% |         |
| Changes in diet                             | Better                                           | 181                   | 64.4%  | 100                   | 35.6% | <0.001  |
|                                             | No changes                                       | 649                   | 70.1%  | 277                   | 29.9% |         |
|                                             | Worse                                            | 164                   | 55.8%  | 130                   | 44.2% |         |
| Children's screen time                      | No answer                                        | 912                   | 66.5%  | 460                   | 33.5% | 0.785   |
|                                             | Does not use                                     | 1                     | 100.0% | 0                     | 0.0%  |         |
|                                             | <1h                                              | 5                     | 71.4%  | 2                     | 28.6% |         |
|                                             | 1-2h                                             | 14                    | 58.3%  | 10                    | 41.7% |         |
|                                             | 2-3h                                             | 30                    | 66.7%  | 15                    | 33.3% |         |
|                                             | 3-4h                                             | 18                    | 69.2%  | 8                     | 30.8% |         |
|                                             | >4h                                              | 14                    | 53.8%  | 12                    | 46.2% |         |
| Medical consultation                        | Yes                                              | 153                   | 58.0%  | 111                   | 42.0% | 0.002   |
|                                             | No                                               | 841                   | 68.0%  | 396                   | 32.0% |         |
| Return to activity after pandemic           | Yes                                              | 261                   | 51.3%  | 248                   | 48.7% | <0.001  |
|                                             | No                                               | 733                   | 73.9%  | 259                   | 26.1% |         |
| Have had COVID-19                           | No answer                                        | 598                   | 67.1%  | 293                   | 32.9% | 0.186   |
|                                             | No                                               | 339                   | 66.2%  | 173                   | 33.8% |         |
|                                             | Yes. but no one in our household                 | 38                    | 54.3%  | 32                    | 45.7% |         |
|                                             | Yes. someone in our household                    | 19                    | 67.9%  | 9                     | 32.1% |         |
| Location of home                            | No answer                                        | 88                    | 64.2%  | 49                    | 35.8% | 0.363   |
|                                             | Urban                                            | 767                   | 65.7%  | 400                   | 34.3% |         |
|                                             | Rural                                            | 139                   | 70.6%  | 58                    | 29.4% |         |
| Size of home                                | No answer                                        | 88                    | 64.2%  | 49                    | 35.8% |         |

|                                           |                | 0-2 negative emotions |       | 3-4 negative emotions |       | p-value |
|-------------------------------------------|----------------|-----------------------|-------|-----------------------|-------|---------|
|                                           |                | n                     | %     | n                     | %     |         |
|                                           | Less than 60   | 27                    | 54.0% | 23                    | 46.0% | 0.031   |
|                                           | From 60 to 120 | 572                   | 64.9% | 310                   | 35.1% |         |
|                                           | More than 120  | 307                   | 71.1% | 125                   | 28.9% |         |
| Outdoor space at home (garden or terrace) |                | 88                    | 64.2% | 49                    | 35.8% | <0.001  |
|                                           | No answer      |                       |       |                       |       |         |
|                                           | Yes            | 501                   | 71.9% | 196                   | 28.1% |         |
|                                           | No             | 405                   | 60.7% | 262                   | 39.3% |         |
| Disability                                | Yes            | 19                    | 51.4% | 18                    | 48.6% | 0.053   |
|                                           | No             | 975                   | 66.6% | 489                   | 33.4% |         |

**Table S4. Quantitative variables in the bivariate analysis of emotional state**

|                                  |                       | n   | Mean | SD   | p-value |
|----------------------------------|-----------------------|-----|------|------|---------|
| Age                              | 0-2 negative emotions | 994 | 6.55 | 3.31 | <0.001  |
|                                  | 3-4 negative emotions | 507 | 7.23 | 3.05 |         |
| Number of children in the family | 0-2 negative emotions | 994 | 1.90 | 0.79 | 0.045   |
|                                  | 3-4 negative emotions | 507 | 1.99 | 0.76 |         |
| Number of adults                 | 0-2 negative emotions | 994 | 2.04 | 0.50 | 0.376   |
|                                  | 3-4 negative emotions | 507 | 2.02 | 0.44 |         |
